# Supplementary material for: Forecasting local surges in COVID-19 hospitalizations through adaptive decision tree classifiers
Source: bioRxiv or medRxiv preprint supplement (doi:10.1101/2024.09.12.24313570), 2024-09-13
Supplement: Supplementary file [file media-1.pdf]

511 **Supplementary information**

512 **S2 Hyperparameter tuning and cross-validation**

513 To avoid over-fitting and to ensure that the classifiers are robust to temporal and spatial  
 514 variation in our dataset, we used the following cross-validation approach to tune hyperpa-  
 515 rameters of each classifier for each week  $t$ :

- 516 (1) Divide the dataset by HSAs into ten validation sets, denoted by  $F_1, F_2, \dots, F_{10}$ :
- 517 (2) For each validation set  $F_i, i \in \{1, 2, \dots, 10\}$ :
- 518 (i) Do a 10-fold cross-validation to optimize hyperparameters using the remaining  
 519 dataset (excluding  $F_i$ ). Let  $h_i^*$  denote the optimized hyperparameters (Table ??)  
 520 for this fold.
- 521 (ii) Evaluate the performance (e.g., auROC) of the optimized model on the validation  
 522 set  $F_i$ . Let  $p_i^*$  denote this estimated performance.
- 523 (3) Return the set of hyperparameters with the highest  $h_i^*$ .

524 The ranges for the hyperparameters are shown in Table S1.

| Parameter         | Range         |
|-------------------|---------------|
| criterion         | gini, entropy |
| Max depth of tree | 2 - 5         |

Table S1: Parameter Grid for Decision Tree

525 **S3 CDC Community Levels**

| New Cases<br>(per 100,000 population in<br>the last 7 days) | Indicators                                                                         | Low    | Medium     | High   |
|-------------------------------------------------------------|------------------------------------------------------------------------------------|--------|------------|--------|
| <b>Fewer than 200</b>                                       | New COVID-19 admissions per 100,000<br>population (7-day total)                    | <10.0  | 10.0-19.9  | ≥20.0  |
|                                                             | Percent of staffed inpatient beds occupied by<br>COVID-19 patients (7-day average) | <10.0% | 10.0-14.9% | ≥15.0% |
| <b>200 or more</b>                                          | New COVID-19 admissions per 100,000<br>population (7-day total)                    | NA     | <10.0      | ≥10.0  |
|                                                             | Percent of staffed inpatient beds occupied by<br>COVID-19 patients (7-day average) | NA     | <10.0%     | ≥10.0% |

**The COVID-19 community level is determined by the higher of the inpatient beds and new admissions indicators, based on the current level of new cases per 100,000 population in the past 7 days**

Figure S1: Criteria for establishing CDC Community Levels [1].

### 526 **S3.1 Evaluating classifiers on entire CDC Community Level train-** 527 **ing period**

528 In the main text, we evaluate the performance the CDC Community Levels, on the data  
529 collected between March 3rd, 2022, and November 25th, 2022. These are compared with  
530 the performance of our decision tree classifiers that are trained on all data collected between  
531 week 1 and week  $t - 1$ . To allow for a more fair comparison, we trained our decision tree  
532 classifiers on the same data as the original Community Levels, collected between March  
533 1st, 2021, to January 24th, 2022. The first two-thirds of the data were used to train the  
534 classifiers, and they were evaluated on the remaining third.

535 Though 95.8% of the weeks designated a “high” Community Level did exceed the hospital  
536 capacity threshold, 87.2% of weeks predicted to be “medium” and 71.0% of the “low” risk  
537 weeks also did. When we designated the weeks predicted to be “high” and where the hospital  
538 capacity exceeded the designated threshold as “true positives”, the CDC Community Levels  
539 have an auROC of 0.663, a value lower than those obtained using the decision tree classifiers  
540 above (Figure S 2).

541 Using the same training and test data, the CDC Optimized classifiers had improved predic-  
542 tive power over the original Community Levels (auROC = 0.818). However, the Reduced  
543 classifier had the best predictive power when trained and evaluated during this 47-week  
544 period (Table S2). The predictive power of these classifiers was comparable to those of the  
545 adaptive classifiers developed on the continually-updated data sets.

Table S2: Comparison of performance of the CDC Community Levels and the decision tree classifiers trained and tested between March 1st, 2021 and January 24th, 2021.

| <b>Model</b>         | <b>auROC</b> | <b>Maximum Regret (auROC)</b> |
|----------------------|--------------|-------------------------------|
| CDC Community Levels | 0.660        | 0.224                         |
| Naive                | 0.720        | 0.184                         |
| CDC Optimized        | 0.817        | 0.087                         |
| Reduced              | 0.904        | 0                             |
| Full classifier      | 0.887        | 0.017                         |

546 The CDC Optimized classifier is solely based on the percentage of beds occupied by COVID-  
547 19 patients. Where the features overlap with the CDC Community Levels, the thresholds  
548 differ (Figure S9).

## 549 S4 Sensitivity Analysis

### 550 S4.1 Change in prediction task

551 In the main text, we focused on predicting whether capacity will exceed a given threshold  
552 in week  $t + 3$ . Here we present the evaluation metrics for models trained on a “shifted” time  
553 period, where the prediction task is to predict hospital capacity over a three-week period  
554 subsequent to  $t$  ( $[t + 2, t + 5]$ ). The auROCs for the Full, CDC A, and Reduced classifiers  
555 trained to predict this outcome were comparable with the prediction of capacity in week  
556  $t + 3$  ( $> 0.80$ ; Figure 2 in the main text). The auROCs of the Naive classifiers was lower,  
557 but still above 0.60 across the 117 weeks.

#### 558 S4.1.1 Change in hospitalization threshold

559 In addition to the hospital capacity threshold of 15 per 100,000 people that was used to  
560 generate our binary outcome in the main text, we also explored two other thresholds: 10 or  
561 20 per 100,000 people. The models were trained in accordance with the procedure outlined  
562 in the main text, though now the feature and outcome relating to hospital capacity are  
563 replaced with a binary variable calculated based on the new threshold of interest.

564 In each case, when the Full or Reduced classifier was used, a high auROC was achieved.  
565 Generally, the model’s performance declined when predicting the lower threshold of 10 per  
566 100,000 (Figure S3), potentially because at most stages during the study period, the majority  
567 of HSAs exceeded this threshold. The models were better at predicting the higher threshold  
568 of 20 per 100,000. Overall, though performance did vary between thresholds, the overall  
569 auROC scores were high, suggesting that the model training procedure is robust to different  
570 outcomes of interest.

#### 571 S4.1.2 Change in duration of outcome period

572 In the main analysis, we predicted whether the hospital capacity would exceed 15 per 100,000  
573 in three weeks’ time. We additionally investigated three other periods: two ( $t+2$ ), four ( $t+4$ ),  
574 or six ( $t+6$ ) weeks. Shorter outcome periods benefited the performance of the model (Figure  
575 S4), particularly when there was a decrease in the proportion of HSAs that exceeded capacity  
576 (around week 90).

#### 577 S4.1.3 Limiting the size of the training dataset

578 The models in the main text have an “expanding” training set, which includes all available  
579 data up to the test week,  $t$ . We tested out more limited training sets, namely restricting  
580 the training data to a four-week ( $[t - 5, t - 1]$ ), ten-week period ( $[t - 11, t - 1]$ ) and a  
581 twenty-six-week period ( $[t - 27, t - 1]$ ). When we included a larger dataset, it actually  
582 had negative impacts on the performance of the model (Figure S5), with the auROC of the  
583 classifier trained on twenty-six weeks of data often worse than the equivalent naive four-week  
584 model.

585 **S4.1.4 Training models every four weeks**

586 As COVID-19 remains a comparatively new disease, and vaccination levels remain heteroge-  
587 neous and relatively low across the country, we predict hospital capacity over the short term  
588 as there remains a risk that the healthcare system will be overwhelmed. We also investigate  
589 the frequency at which the decision tree classifiers should be retrained with new, more recent  
590 data to ensure their continued accuracy.

591 Rather than deliver predictions every week, we trained models to deliver predictions every  
592 four weeks using all data available up to  $t$ , and predict over the next four weeks and associated  
593 outcome periods. In this scenario, the performance metrics varied less week-to-week (Figure  
594 S6), though the classifiers still had reduced performance when there were large changes in  
595 the proportion of HSAs where the hospital capacity exceeded 15 per 100,000, though overall  
596 performance was comparable to that of the weekly models.

597 **S5 SI Figures**

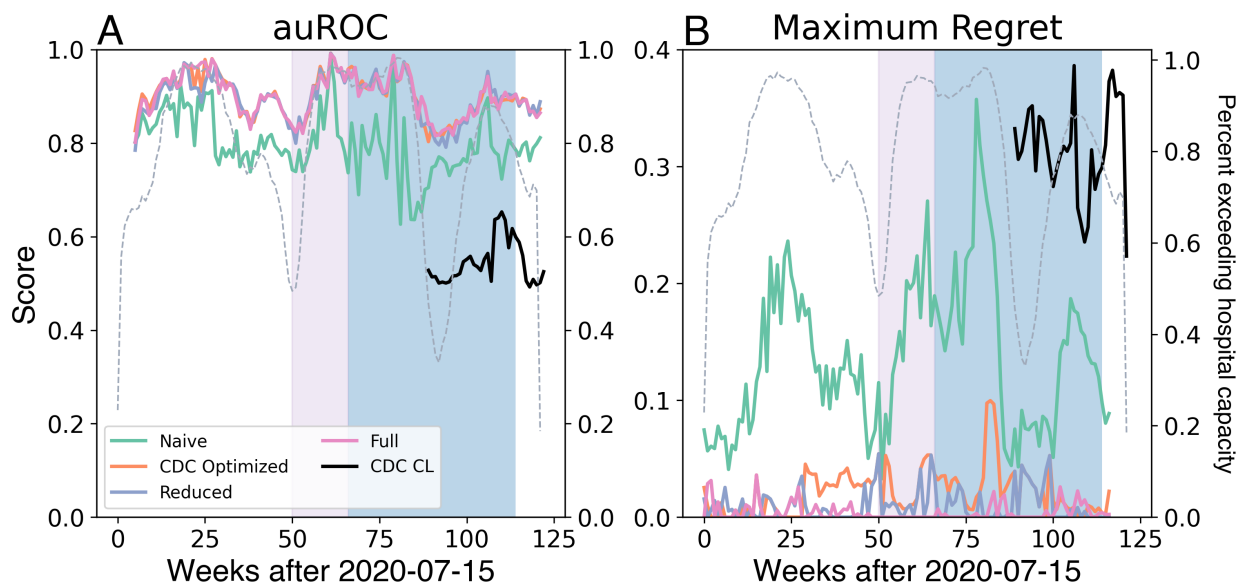

Figure S2: **Performance of decision tree classifiers** when the outcome of interest is whether the hospital capacity exceeds 15 per 100,000 in the “shifted” three-week period. (A) auROC, (B) maximum regret of the auROC. The pink shaded box shows when the delta strain was dominant, the blue when the omicron strain was. The gray dashed line shows the proportion of HSAs that exceed the hospitalization threshold for a given week.



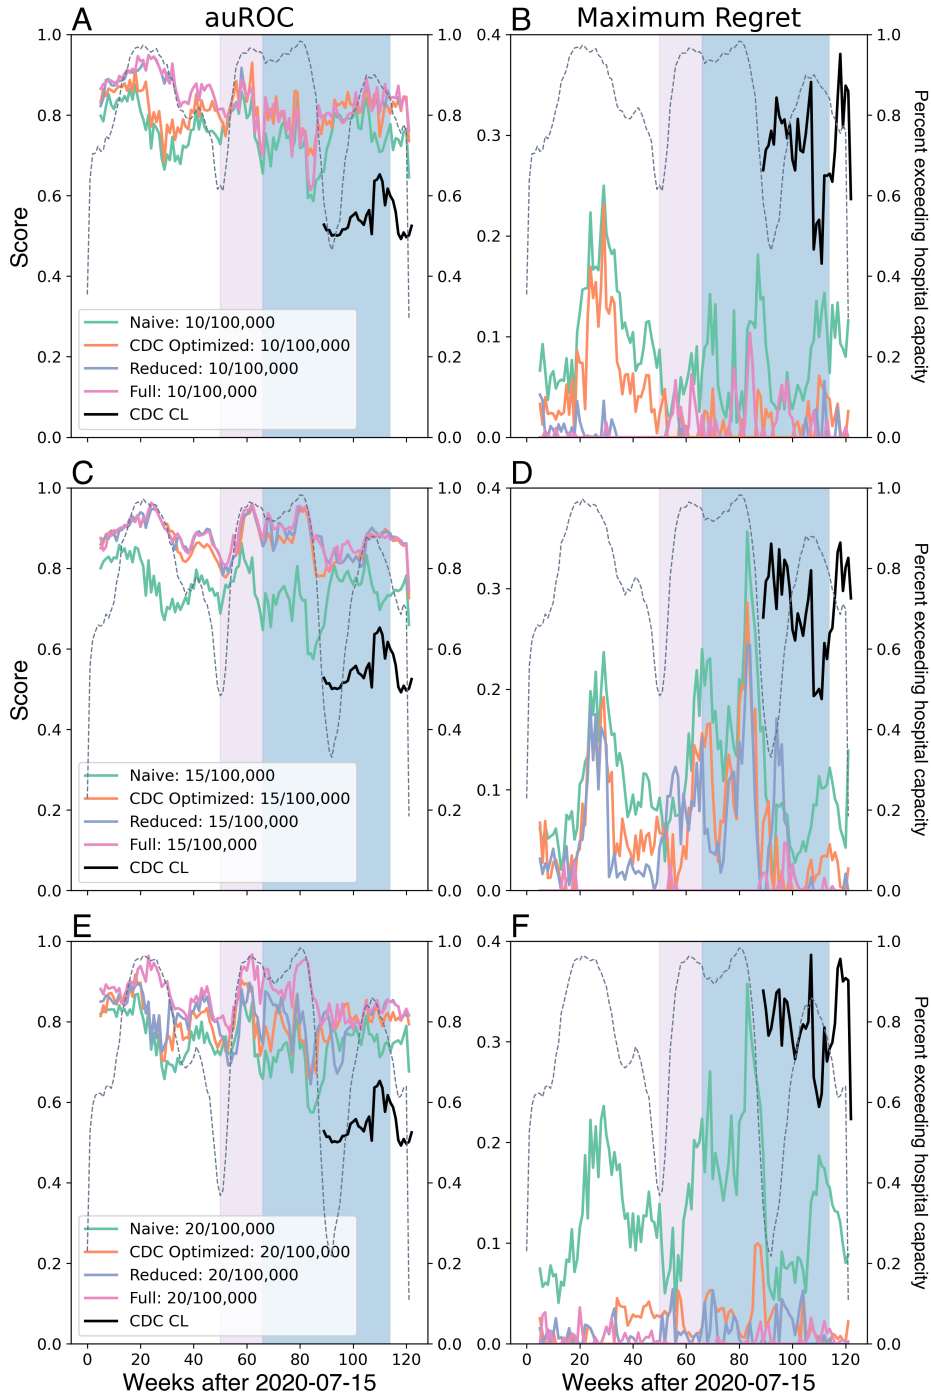

Figure S3: **Performance of decision tree classifiers** when the outcome of interest is whether the hospital capacity exceeds either 10 or 20 per 100,000 during the outcome period. (A) The auROC, (B) the maximum regret. The pink shaded box shows when the delta strain was dominant; the blue when omicron was. The dotted gray line shows the proportion of HSAs that exceeded each given hospitalization threshold.

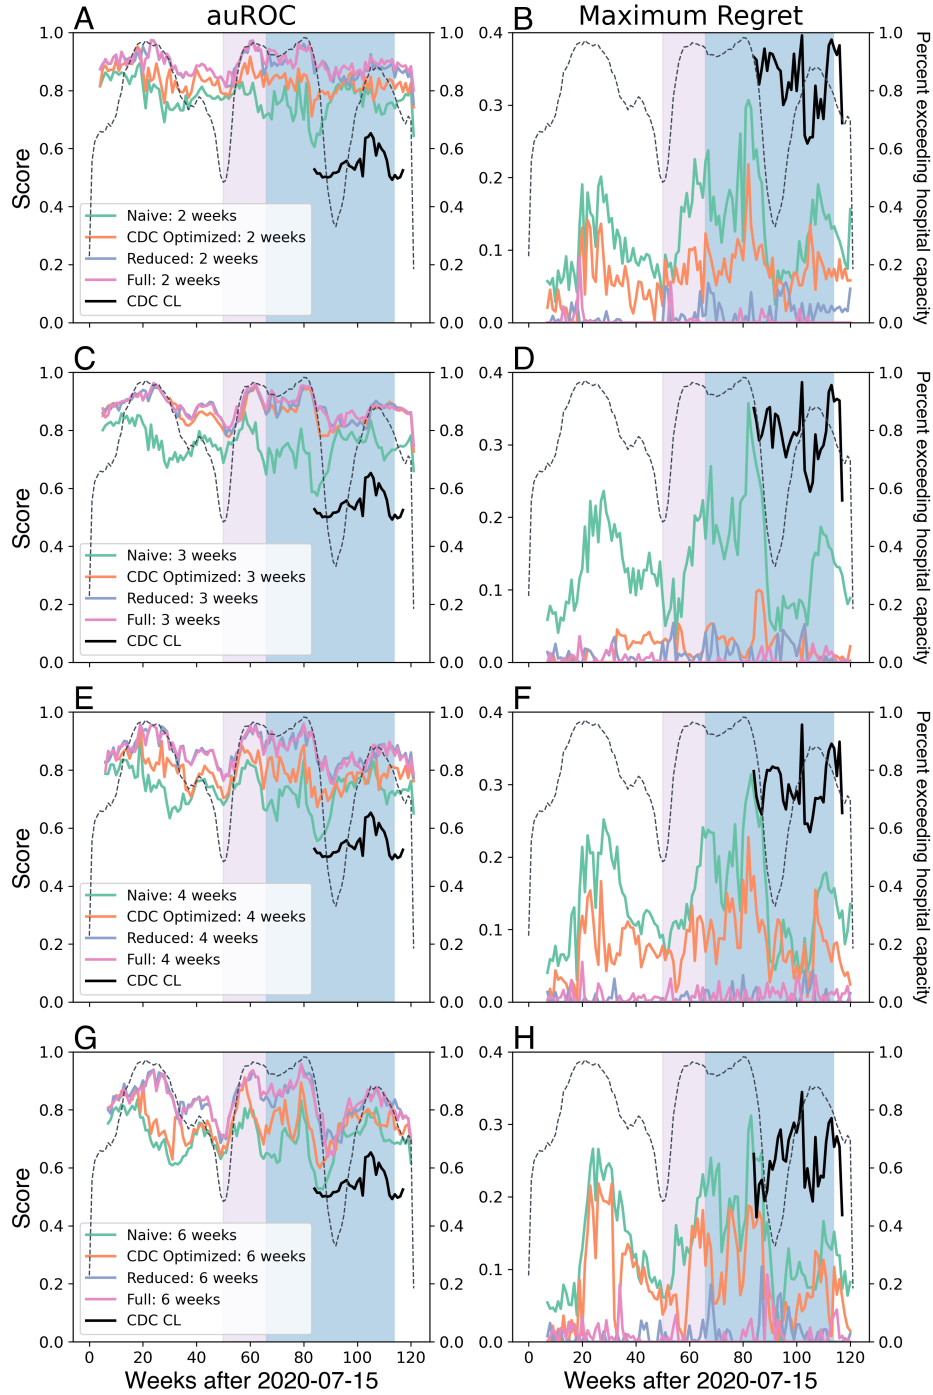

Figure S4: **Performance of full decision tree classifiers** when the outcome of interest is whether the hospital capacity exceeds 15 per 100,000 people in over a 2, 3, 4, or 6 week period. (A), (C), (E), (G) show the auROC, while (B), (D), (F), (H) show the maximum regret per the auROC for each outcome period. These models are developed on an using all data previous to the target week of interest. The pink shaded box shows when the delta strain was dominant; the blue when omicron was. The dotted gray line shows the proportion of HSAs that exceed each given hospitalization threshold.

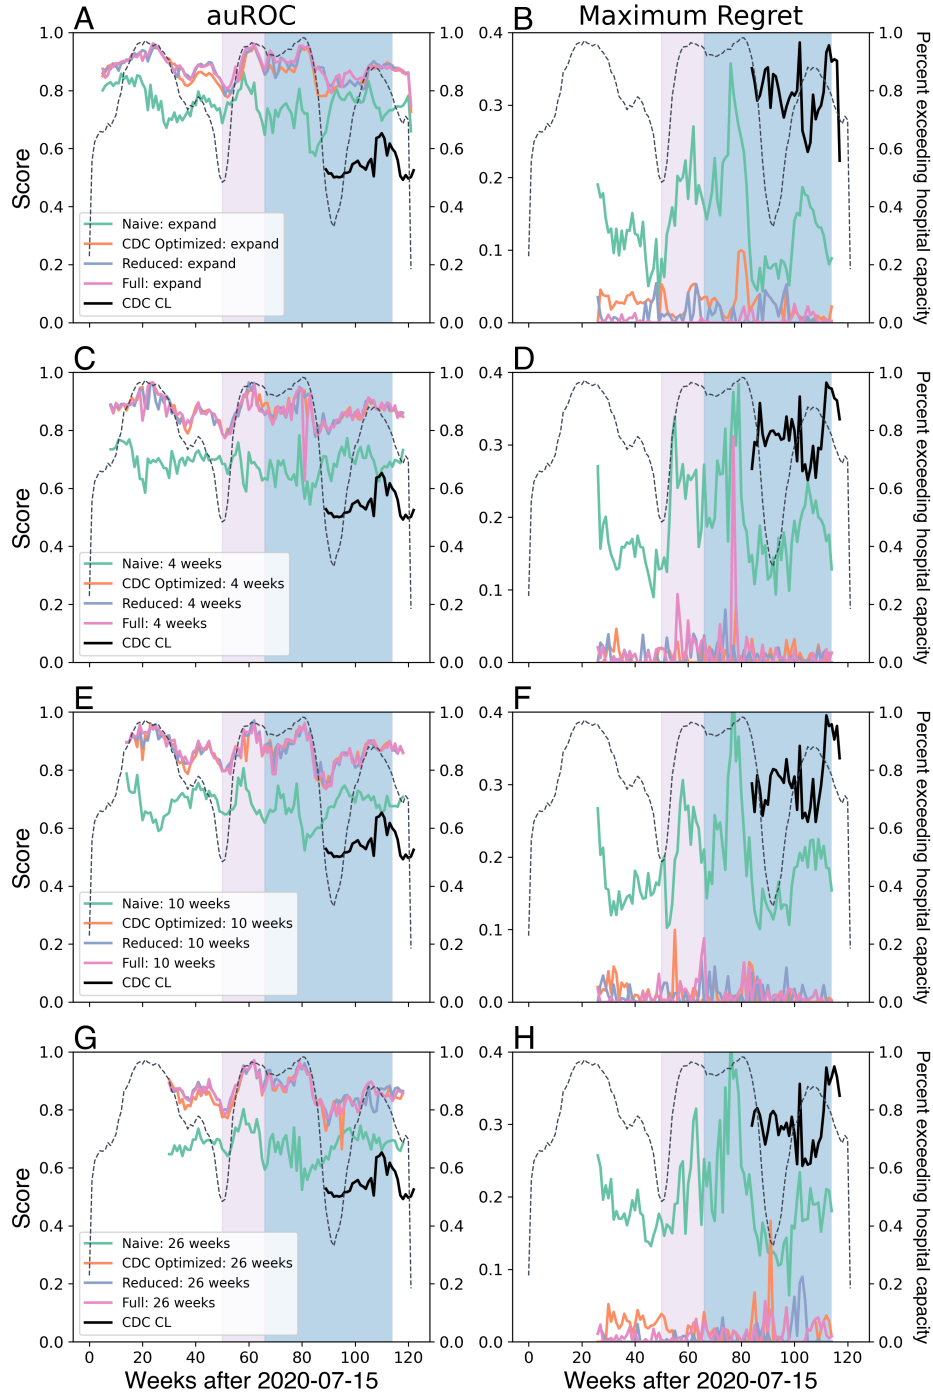

Figure S5: **Performance of full decision tree classifiers** when the training set is either the previous 4, 10, or 26 weeks. (A), (C), (E), (G) show the auROC, while (B), (D), (F), (H) show the maximum regret per the auROC for each training period. The pink shaded box shows when the delta strain was dominant, the blue when the omicron strain was. The dotted gray line shows the proportion of HSAs that exceed each given hospitalization threshold.

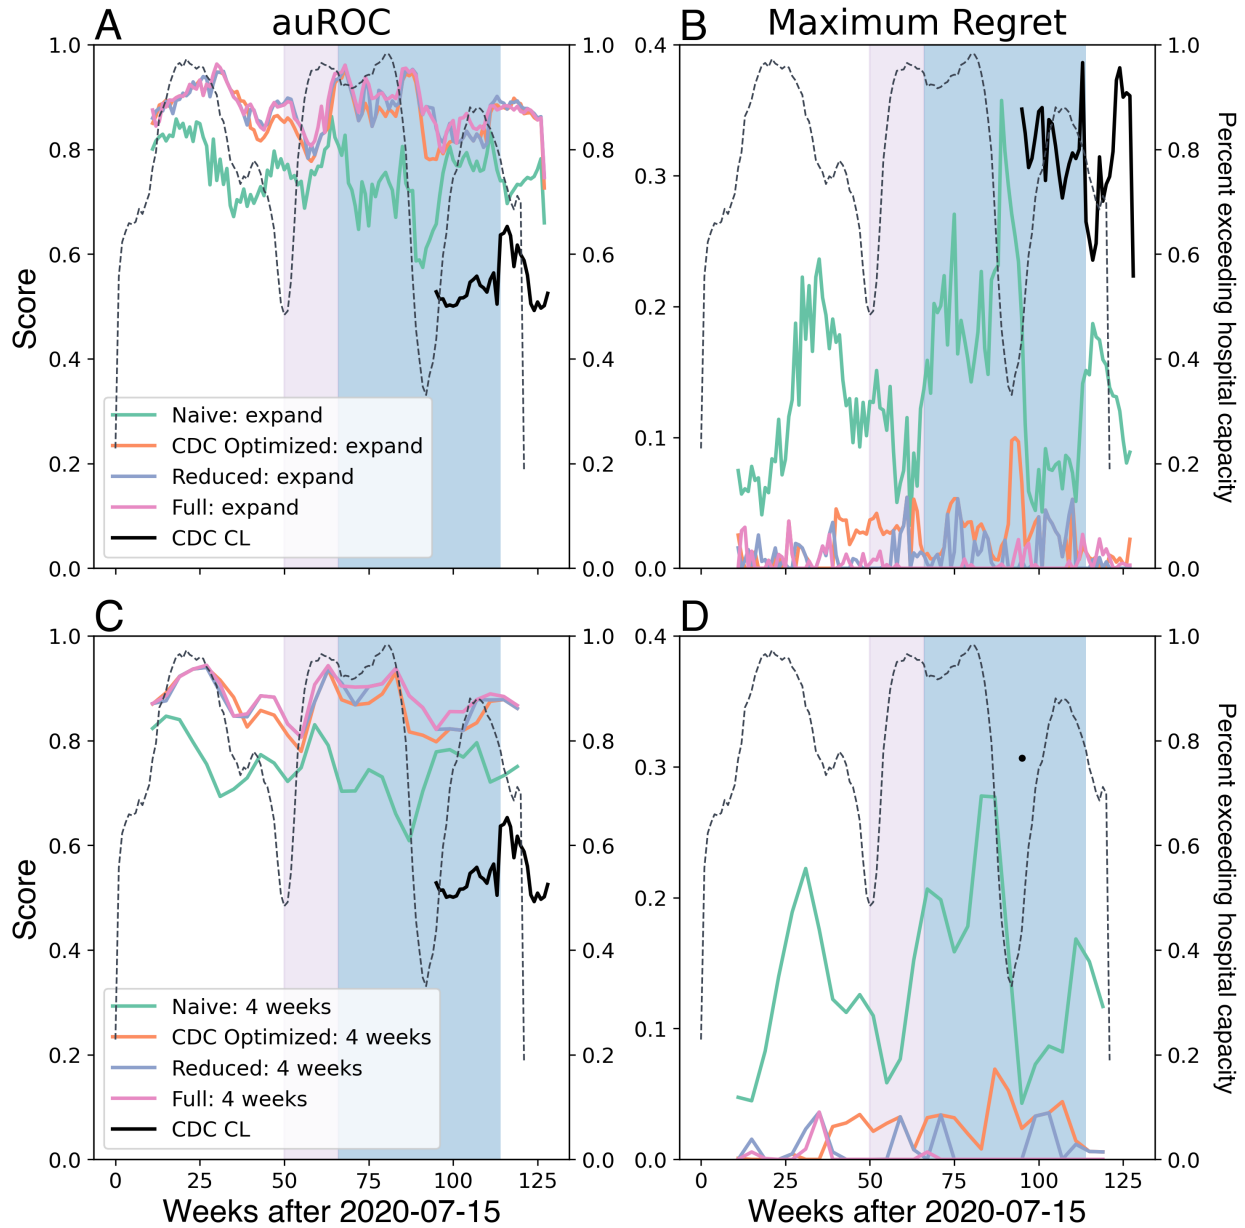

Figure S6: **Performance of decision tree classifiers** when the model training set is only updated every four weeks, and predict whether hospitalizations will exceed capacity over the next four outcome periods. (A) and (C) The auROC, (B) and (D) maximum regret for the auROC. The pink shaded box shows when the delta strain was dominant; the blue when omicron was. The dotted gray line shows the proportion of HSAs that exceed each given hospitalization threshold.

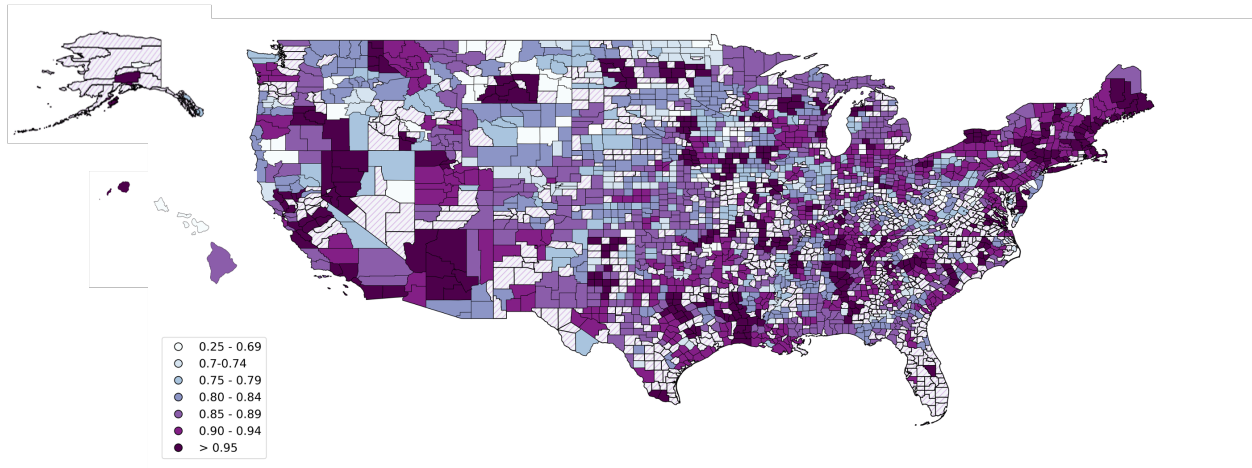

Figure S7: Performance of the decision tree classifiers across all HSAs when COVID-19 death and case data is used. The auROC was calculated by HSA using the predictions from all 177 Full classifiers. The hatching indicates where there were no true negative instances with which to calculate the auROC, and the auROC is recorded as NA.

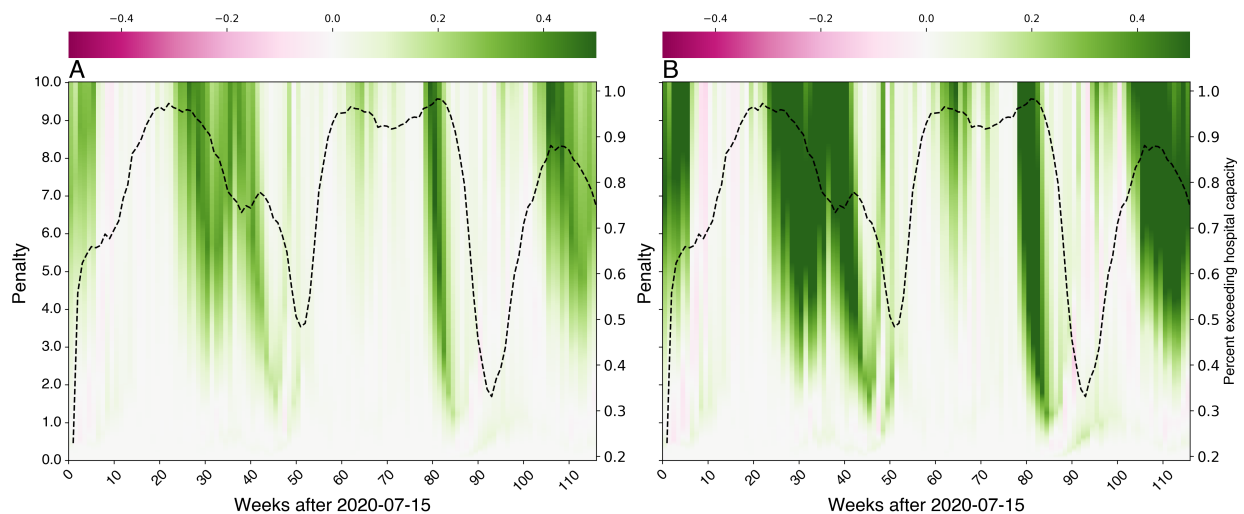

Figure S8: The net benefit of the Full classifiers related to the Naive classifiers. (A) Using the net benefit function  $NB_P()$ , which accounts for false positive and true positive rates and (B) Using the net benefit function  $NB_{P,N}()$ , which accounts for true and false positive rates and true and false negative rates. In areas shaded green, the Full classifiers outperform the Naive classifier, while areas shaded pink indicate where the Naive classifier performs better. The gray dashed line is the proportion of HSAs that exceeded the 15 per 100,000 hospital capacity for a given week.

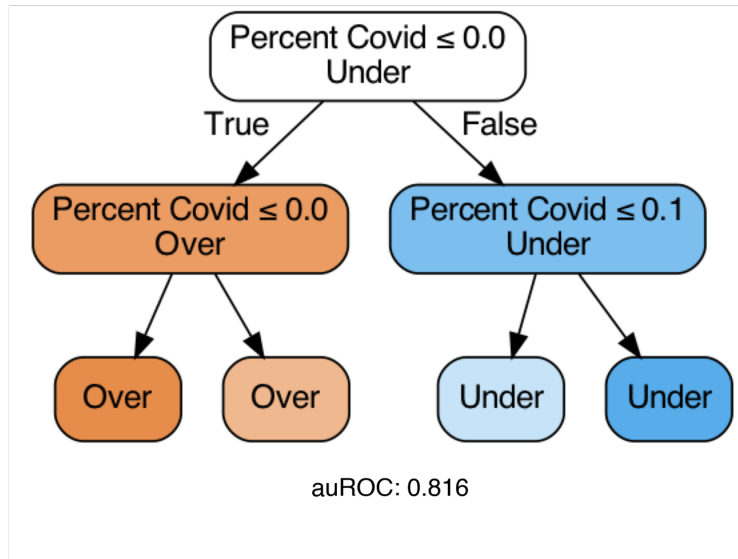

Figure S9: **Decision tree classifiers trained on data from March 1st, 2021 to January 24th, 2021.** (A) Using the same features as the CDC Community Levels.

## 598 **References**

- 599 [1] Centers for Disease Control, Prevention, et al. Indicators for monitoring COVID-19  
 600 Community Levels and COVID-19 and implementing COVID-19 prevention strategies.  
 601 *PowerPoint presentation, February, 25, 2022.*
